# Supplementary material for: Bioinformatics and Transcriptome Analysis of CFEM Proteins in Fusarium graminearum
Source: MDPI journal article supplement (doi:10.3390/jof7100871), 2021-10-16
Supplement: s1 [file s1]

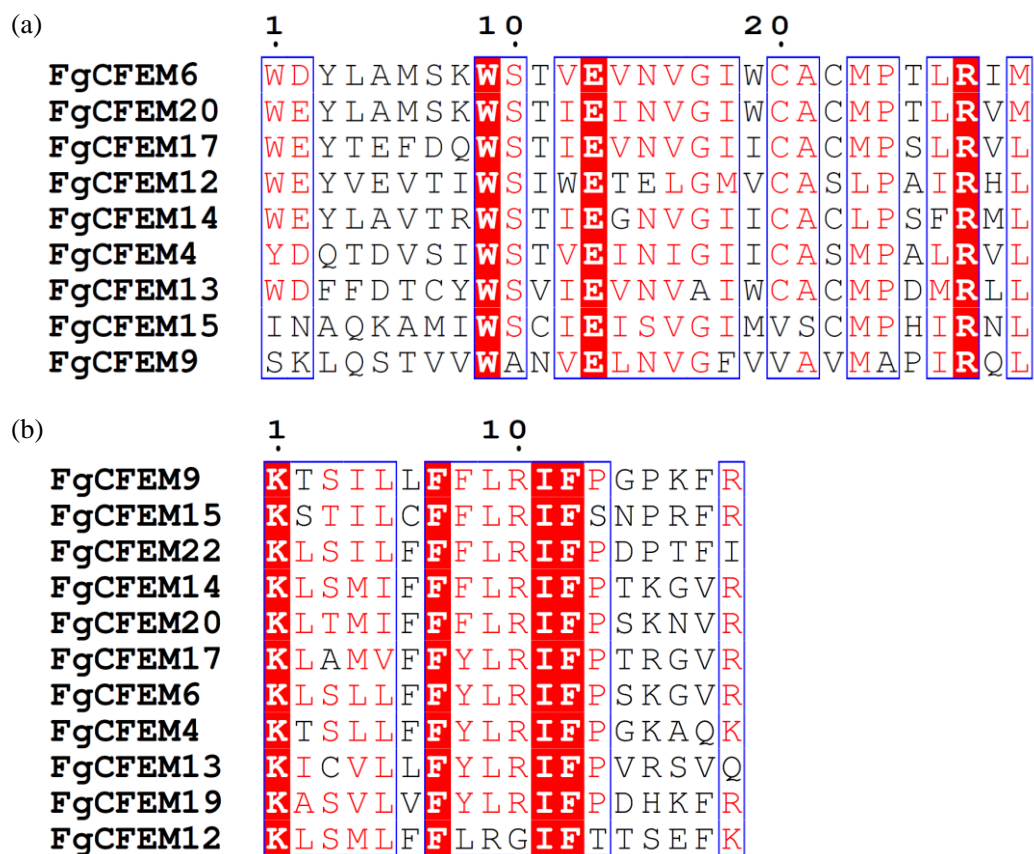

**Figure S2.** Multiple sequence alignment of WR (a) and KF (b) motifs. Red color font: conserved AA in some but not all the aligned FgCFEMs, red color background: conserved AA in all the aligned FgCFEMs.
