# Supplementary figures and images for: Bioinformatics and Transcriptome Analysis of CFEM Proteins in Fusarium graminearum
Source: MDPI journal article supplement (doi:10.3390/jof7100871), 2021-10-16

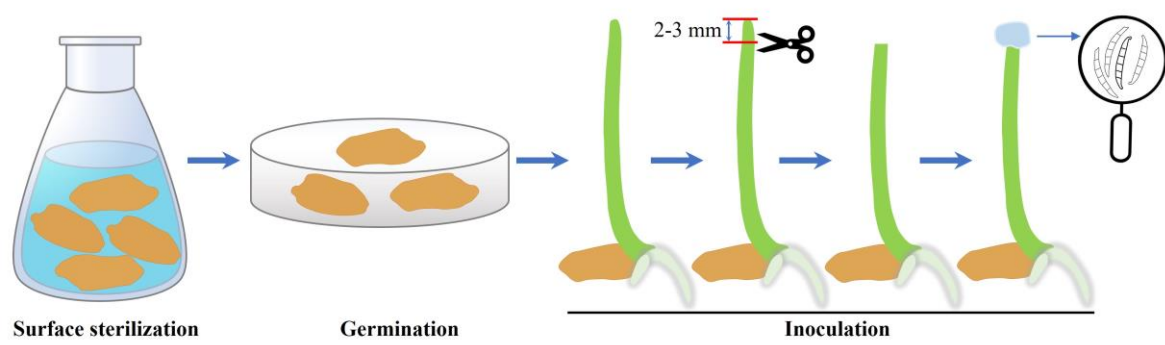

**Figure S1.** A scheme for wheat inoculation protocol.

Supplement: s1 [file s1]
